# Supplementary material for: Autophagy Contributes to the Maintenance of Genomic Integrity by Reducing Oxidative Stress
Source: PubMed Central journal article supplement (PMC7471819; doi:10.1155/2020/2015920), 2020-08-25

## **Supplementary Materials:**

FIGURE S1. Autophagy reduces X-Ray induced micronuclei. (a-b) HT1080 cells and U2OS cells were pretreated with or without autophagy activator Rapa (20 nM) for 6 h, and then were treated with 5 Gy X-ray. Cells were fixed for measurement of the frequency of MN at 48 h after Rapa was washed out. \*P < 0.05, \*\*P < 0.01.

FIGURE S2. Inhibition of autophagy in cancer cells without elevated ROS. (a) HT1080 and U2OS cells were treated with CQ (50  $\mu$ M) for 24 h for examination of ROS using Flow cytometry. (b) HT1080 cells and U2OS cells were transfected with ATG5 siRNA or Control-siRNA, and cells were harvested for test 48 h later.

**Figure S1**

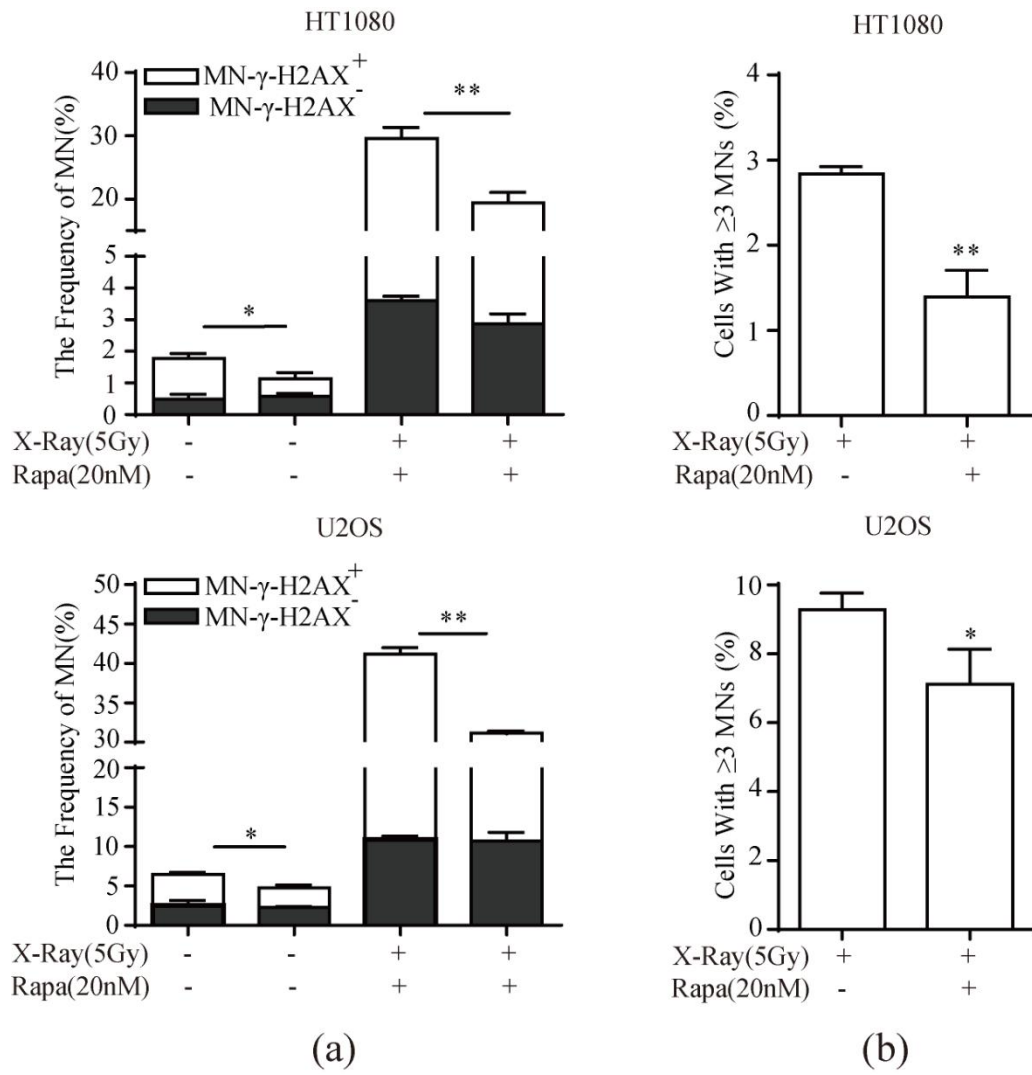

**Figure S2**

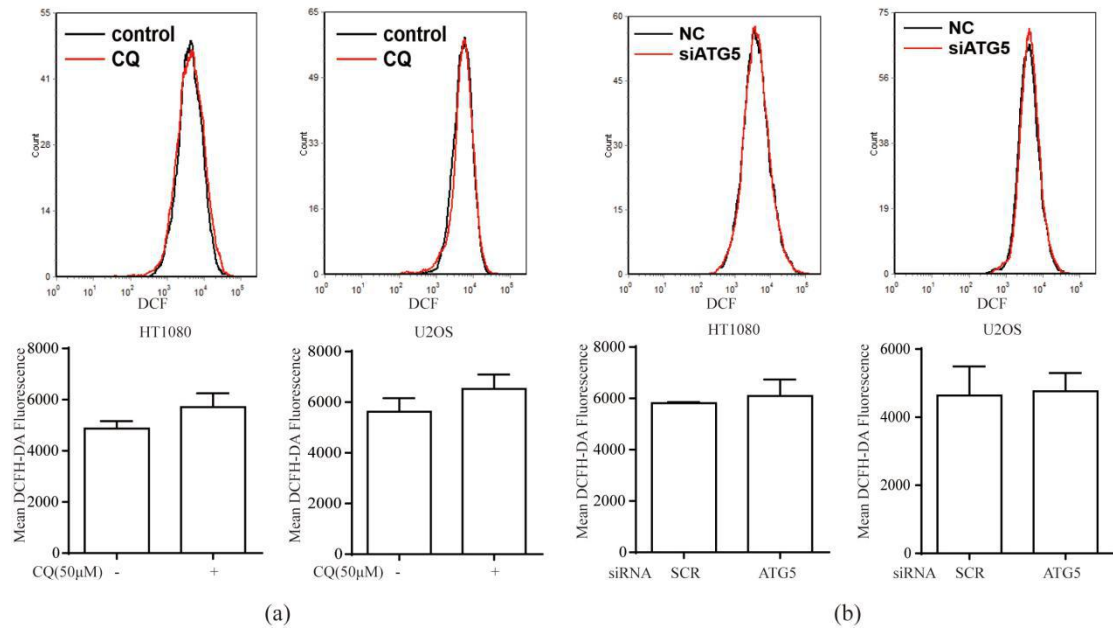

Supplement: 2015920.f1.pdf [file 2015920.f1.pdf]
